# Supplementary material for: Intraspecific variation in the pterosaur Rhamphorhynchus muensteri—implications for flight and socio-sexual signaling
Source: PeerJ. 2024 Jul 18;12:e17524. doi: 10.7717/peerj.17524 (PMC11260407; doi:10.7717/peerj.17524)
Supplement: Supplemental Information 1 — The dataset is available in the first sheet. Subsequent sheets each summarize a particular comparison test between elements. [file peerj-12-17524-s001.xls]

## Sheet: RHAMPHOR
Specimen Number	Source	Wellnhofer NUM	ORB	SKL	NECK	PCRW	TAIL	HUM	RAD	MC4	WP1	WP2	WP3	WP4	FEM	TIB						Y1	Y2	Y3	Y4	Y5	Y6	Y7	Y8	Y9	Y10	Y11	Y12	Y13	Y14
			Y1	Y2	Y3	Y4	Y5	Y6	Y7	Y8	Y9	Y10	Y11	Y12	Y13	Y14					Y1	n/a
TM 6924	Wellnhofer, 1975	1	11	40	21.5	47.5	106.5	16.5	26.7	10	37	31.8	28.9	32.4	12.5	15.5					Y2	0.951789	n/a
	Wellnhofer, 1975	2	10	35	18		112	15.3	26	10	33	31.5	27	31	12.4	15.4					Y3	0.907946	0.903251	n/a
TM 6390	Wellnhofer, 1975	3				36	85								11.8	14					Y4	0.965362	0.978604	0.931639	n/a
	Wellnhofer, 1975	4		36		39	115	17	28	10	37.5	33	29.7	33.5	13.8	16.4					Y5	0.917945	0.979312	0.951462	0.989697	n/a
BSP 1877 X 1	Wellnhofer, 1975	5			15.5	36.5	100	14.6	23.8	9.6	31.1	29	27	30.8	11.5	13.7					Y6	0.929779	0.957427	0.948967	0.970611	0.964548	n/a
Lost	Wellnhofer, 1975	6	12	35	23	40	110														Y7	0.909572	0.947356	0.9498	0.97467	0.964284	0.969491	n/a
BSP 1889.XI.1	Wellnhofer, 1975	7	10	35	20	41	106	15.5	24	9.5	32.3	28.6	26	28.5	11.7	15					Y8	0.862543	0.903196	0.921937	0.94904	0.931643	0.938044	0.947339	n/a
Uppsala / Leiden	Wellnhofer, 1975	8		31				14.5	24	8		27.5	24.5	23							Y9	0.943457	0.946939	0.936689	0.971321	0.976021	0.948309	0.967447	0.922609	n/a
BSP 1960.I.470	Wellnhofer, 1975	9			17	36	79								10.5	13.1					Y10	0.890306	0.963211	0.924266	0.971248	0.969286	0.95264	0.970773	0.92304	0.986614	n/a
BSP 1959.I.400	Wellnhofer, 1975	10	12.5	41	23	47	125	19	32	12	44	40	35	39	15.7	19					Y11	0.857698	0.949751	0.902331	0.977146	0.968084	0.937772	0.954019	0.910479	0.973926	0.994857	n/a
BSP 1938.I.503	Wellnhofer, 1975	11	12	41		46	134	17	29.5	11.6	40.5	38	34	40	12.5	17					Y12	0.872665	0.951928	0.950758	0.971818	0.962602	0.92392	0.965409	0.919117	0.969165	0.981244	0.98701	n/a
SOS 2454 (1966.6)	Wellnhofer, 1975	12		33	22.5	36	96	16.8	27	9	35.5	30	27	28							Y13	0.915265	0.942949	0.924757	0.960113	0.956484	0.96227	0.976712	0.937506	0.953559	0.967521	0.957745	0.948065	n/a
	Wellnhofer, 1975	13			23	32	80	14.5	25	9	31	26.7	26	28.5	14	15					Y14	0.875048	0.955208	0.903097	0.969539	0.971854	0.957152	0.980445	0.932358	0.947943	0.97556	0.970706	0.960531	0.983183	n/a
	Wellnhofer, 1975	14					82	14	23	11	29	26.5	23	30	12	14
	Wellnhofer, 1975	15		34	23	35	100	15.3	25.5	9.5	36	30.8	27	26.2	12.3	14.5					Note to reader: this matrix purposefully excludes p value calculations, because the permutation effect renders alpha values worthless in this case. Table merely shows that correlation coefficients across all pariwise comparisons are large. This table can also be used as a cursory "lookup" table for looking at correlation effects of added/deleted specimens.
	Wellnhofer, 1975	16	14	46.3	33	57.5									14.7	18.3
	Wellnhofer, 1975	17		39	23	43	122	18	28	11.2	39.5	36	34.2	38	13.5	18.5
	Wellnhofer, 1975	18			23.5	38.5	110	15.5	25	9	32.5	28.5	25	27	10.5	14.5
Berlin	Wellnhofer, 1975	19		31				16	26	10	36	29.5	27	31.5
	Wellnhofer, 1975	20		25	17	31	73	14.5	22.5	7.8	29.3	24	22	24.8	11	12.5
CM11433	Wellnhofer, 1975	21	9	42	20	35	123.5	16.5	26	10	37.3	35	32	36
MMK V45/1	Wellnhofer, 1975	22						13.5	21	8.5	30	25.3	23	26	11	13
MMK 1891 740	Wellnhofer, 1975	23						15.5	24.7	9.5	33.2	29.3	27.3	28
BSP 1936 I 36	Wellnhofer, 1975	24	14	50.2	35	48	140	19.5	30	11.8	50	46	40	45.5
	Wellnhofer, 1975	25	13.5	57	36	54		24	36	14	48	42	36.5	37	18	20
UB E 554	Wellnhofer, 1975	26	15	54.3	34	57	163	21.8	37.5	13.7	53.8	49.4	43.5	47	17	22
BMNH 42738	Wellnhofer, 1975	27		65		69		24.5	40	15	60	55	48.5	53	16.5	22.5
Eichstaett	Wellnhofer, 1975	28	13.2	55.5	35	58	171		34	14	50.5	41	35	38.3	17	21
	Wellnhofer, 1975	29	13	50	26	55	148	19	33.5	10	49.5	42.5	37.5	42.5	16	18.5
SOS 1951 14	Wellnhofer, 1975	30		45	23	43		17.5	27.5	6
	Wellnhofer, 1975	31						20	32.6	12.5	45.7	43.3	39	44.3
SMF R 4185	Wellnhofer, 1975	32			32.5	52.5									17.3	22
YPM 1778	Wellnhofer, 1975	33	22	90.5	55		250	31.5	56	17	95	75	74	80
	Wellnhofer, 1975	34					260	33	56	19	91	86	77	80.5	28	36
	Wellnhofer, 1975	35	19	94
	Wellnhofer, 1975	36	24	97				34	58	18	95	86.5	81	84.5	28	40
AMNH 1943	Wellnhofer, 1975	37	26.5	112.5				38.5	67.3	21	114.1	108.6	97.7	92	35	49.5
TM 6920 21	Wellnhofer, 1975	38	21	112		112.5		42	66.1	21.7	109	107.3	101		36	50.3
BMNH 37003	Wellnhofer, 1975	39				94	320			23	113	112	101		32	49
BSP 1867 II 2	Wellnhofer, 1975	40	27.5	112	67
BSP AS VI 34	Wellnhofer, 1975	41	22	104.5				39.5	68.5	21	117.5
BMNH 37787	Wellnhofer, 1975	42					362	45	73.5	24	123.5	119	112	111.5
SMF R 4128	Wellnhofer, 1975	43	20	103	71	107	320	38	66	21	114.5	114	106.5	101	33	48.5
	Wellnhofer, 1975	44	23				277	32	59.5	19	92.5	87.5	80	86.5	31	42
	Wellnhofer, 1975	45	22.5	90	58		264	32		18	101	97	90	89	31	38.5
	Wellnhofer, 1975	46	22.5	100				36.5		22	99	95	85	81	30
	Wellnhofer, 1975	47						31	56.7	17.3	83	78.5	70	69.9	26.7
HLD V.432	Wellnhofer, 1975	48		92	66	95		34	56	19.5	92	91			28.5	37.3
BSPG 1955 I 28	Wellnhofer, 1975	49	26	110	76	103		42	72.5	25	120	112			37	51.5
ES	Wellnhofer, 1975	50	23	98.5	60	105		35.5	64	22.3	100	94	85	79	30.8	43.5
Berlin	Wellnhofer, 1975	51	24	102	70			37	60	21	102.5	100		86.5	30
BSP 1929 I 69	Wellnhofer, 1975	52	32	160		138		59	99	34	178				52	71.5
CM 11429	Wellnhofer, 1975	53	20	90			235	36	61.5	20	88.5	84	76			38.5
CM 11432	Wellnhofer, 1975	54	20	90	51	81	254	34.5	59	19.7	96	91	83	88	28.5	40.5
BMNH R2786	Wellnhofer, 1975	55		95				38	62	19	102	94	86.5	80	30
CM 11431	Wellnhofer, 1975	56	23	101.5				39	60	19	100	95			31	48
BSP AS.I.771/1880.II.8	Wellnhofer, 1975	57						40	62.5	21	105.4	99	89.5	90.5
BSP 1927.I.36	Wellnhofer, 1975	58	21.5	105	45	105	300			21.5	101	103	95		35	48
CM 11427	Wellnhofer, 1975	59		99	68	100		40	61		105	103	95	87.5	29.5	48.5
BSP 1907 I 37	Wellnhofer, 1975	60					312			25			100	98	35.5	52
BSP AS.I.772	Wellnhofer, 1975	61	21	106	58		325	42	70	21	120	118	109.5	102.5	36	53.5
	Wellnhofer, 1975	62	23	104			307	40.5	67	21	111	108	99	92		51
	Wellnhofer, 1975	63	25	103.5			380	41	71	22.5	110	109	99.5	99	35.7	50.5
	Wellnhofer, 1975	64		92				34.5	57.5	19.5	96	92	81	81
	Wellnhofer, 1975	65		80	54		265	31	55	19	88	81	72	68.5
MSA	Wellnhofer, 1975	66	22.5		64			44	68		117	105			36.5	53
	Wellnhofer, 1975	67	21	95	61	87	262	35.5	58	16.7	93	87.5	78	75.5		43
	Wellnhofer, 1975	68	19	78.7	47.5	81.5		29.5	53.7	19					25.5	34.5
	Wellnhofer, 1975	69	24	95				40	58	20	99	95	86	81.5
PU 11984	Wellnhofer, 1975	70	21.5	94				35	60	20	96.5	94	86		30.5	39
MMK 1891 738	Wellnhofer, 1975	71			51	72		30	50.5	17.3	80.5	70.5	62.5	62	25.3
MNHU 3965 3967	Wellnhofer, 1975	72	23	100	60	102			64	21					27	46
	Wellnhofer, 1975	73						35				102.3			31	42
TM 6922.23	Wellnhofer, 1975	74	26	124.3	74	106	325
GPIH MYE 13	Wellnhofer, 1975	75	25.7	123.3	66.5	101		38.5	61	18	102.5	100	90.5	94.3	27.5	41
USNM 2420	Wellnhofer, 1975	76	26.5	116	68	107	343	41	71	22	112	110	103	101.5	30	50.6
SOS 3558	Wellnhofer, 1975	77	27	125	71	114	340	43	68	20	113	108.5	98.5	102	30	44
BMMS 5.AS.6	Wellnhofer, 1975	78		91	64	76	245									38.5
	Wellnhofer, 1975	79					254	36	61.5	21	99.5	99	92.5	94	26	38.5
GIH WLL 1	Wellnhofer, 1975	80	17.5	87	58	66		33	58.5		93.5	87				38.5
Tubingen	Wellnhofer, 1975	81	30.5	150	127	136		64.5	96	35	149				45.5	64
BMNH 37002	Wellnhofer, 1975	82	40	191.5				79			202	169	140	136
CM 11428	Wellnhofer, 1975	83		95			260	44	64	20	100	92.5	86	81	30	42
	Wellnhofer, 1975	84		78.5			228	34	54.5	16.5	83	79.5	69	69
BMNH 37012	Wellnhofer, 1975	85	10.5	28	27	36	93.5								15
BMNH 43004	Wellnhofer, 1975	86						37	62	20	103	95	88	84
GPIH EIN 1	Wellnhofer, 1975	87		100
SMS 3696	Wellnhofer, 1975	88
CM 11434	Wellnhofer, 1975	89		105
PTH 1956 1	Wellnhofer, 1975	90						35	58.5	25	100
	Wellnhofer, 1975	91											89	83.5
PTH 1955 135a	Wellnhofer, 1975	92						37	59.5	19	99	92	85	83	31	43
	Wellnhofer, 1975	93						35
	Wellnhofer, 1975	94							64	20	102	97	88	86
SMF R 4047	Wellnhofer, 1975	95		87				36.5	60.5	20	101.5	92.5	86.5	75	27.3	41
SMF R.4125	Wellnhofer, 1975	96					290									46
	Wellnhofer, 1975	97					307
	Wellnhofer, 1975	98
	Wellnhofer, 1975	99					237		56	18	89.5	82.3	74.8	76.7		42
SU	Wellnhofer, 1975	100										93
MM	Wellnhofer, 1975	101						39	63.5		99	96.5
	Wellnhofer, 1975	102					357
MM	Wellnhofer, 1975	103													32.5	46.2
PMZ A/III 109	Wellnhofer, 1975	104						45.5	70
MCZ 1504	Wellnhofer, 1975	105						38	63	19	105	105.5	90.5	84
	Wellnhofer, 1975	106						40	63.5	23	102	100
	Wellnhofer, 1975	107							65		105
SMS 9620	Wellnhofer, 1975	108						35.5	58.5	21.5	95	92.7	85.3	82
CM 11432	Direct Measurement			63.3				31.9	58.2	21.8	92.3	91	83.6		28.1	40.5
CM11429	Direct Measurement			85.5				41.6	56.9		85.3	84.6	74.2	55.5
CM 11431	Measured from photo			101.6				38.3	65	22.2	174.4				31.7	40.5
NHMI F.10172	Direct Measurement			66	40		192	25	40	20	57	51	47	53	18	26
WDC CSG 255	Tischlinger pers comm photo			101.5	64.7		287		66.2	25	100.5	102.4	93.9	93	31.5	43.9
Dark Wing	Scaled from Frey et al. 2003			94.7	68.8			24.7	58.8	24.1	99.4	91.2			27.1	42.9
NHMW1198z0077/0001	Hone, 2012			49.8	33.2			19.4	33.2	13.3	47.8	46	40.4	41.5		18.3
MTMV2008.33.1	Osi & Prondvai 2009		22	101	55		253	34	59	19.4	98.8	92.2	82.6	75.9	30
TMP 2008.041.0001	Direct Measurement		18	91	53		259	33	62	19	96	98	93	94	26	38
BSP 1989.XI.1	Measured from photo			85.9	86.9			40.9	86.9	24.5	118.6	87.9	70.5
BSP 1980.I.23	Measured from photo							52.3	76.6	31.5	125.2	101.8	82	84.7	39.6	55
BSP 1977.I.226	Only a lower jaw but included for completeness
SMNK PAL 6596	Measured from photo			68.9			187.7	32.8	62.3	19.7	91.8	93.4	77.9	73.8	28.7	37.7
FGM V 258 Second part of RAM 14522)	Direct Measurement						263
MBR 3633.1	Measured from photo			94	86											48
MBR 3652 (cast)	Direct Measurement			40			92		41	15					13	21
MBR 3651 (cast)	Direct Measurement			96
MBR 3643.2	No material is complete so not measured
MBR 3650.3	Direct Measurement			35	30		119	17	27	12	35	33	29	29
MBR 3630	Direct Measurement						101		26	12	34		27	32
MBR 3643.1	Direct Measurement			102	53			38	62	25		97			31
RAM 14522	Direct Measurement							32.7			94.3	90.6	81.4	80.8	30	42.1
Unnumbered NSM PV	Measured from photo			91			258	34	57		84	80	68	51
BMMS 6	Direct Measurement						82	15	25	9	29	26	24	29	12	15
BMMS 3a	Direct Measurement			21	22		77	15	25	11	31	27	25	30	16	15
BMNS 21	Direct Measurement		16	95	56		291	38	63	24	95	92	84	94		44
ROM 55352	Measured from photo		22	120	56		350	39	76	23	119	109	98	93		61
NMS G.1994.13.1.	Measured from photo		19	113			325		70			129	127	113		57
LCUDZ X1093	Direct Measurement		21	105.8	72										32.5
		STDEV	6.15	32.9686	22.695	31.1341	95.9453	11.915	18.2735	5.88804	35.637	31.7758	30.0703	28.0075	9.50081	15.0167
		MEAN	20.3709	82.6022	47.7274	68.9043	209.08	31.7768	52.0804	17.7316	84.956	77.6531	67.8584	66.1735	25.0545	35.6525
		Ratio	0.301901	0.399124	0.475513	0.451846	0.458893	0.374959	0.350871	0.332064	0.419476	0.409202	0.443133	0.423244	0.379205	0.421197
		MEDIAN	21.5	92	52	57.5	237	34	58.5	19	95	91	78	75.9	28	40.25
		Md-Mn	1.12909	9.39775	4.27258	-11.4043	27.92	2.22323	6.41961	1.26837	10.044	13.3469	10.1416	9.72651	2.94545	4.5975
	Genus	Species	ORB	SKL	NECK	PCRW	TAIL	HUM	RAD	MC4	WP1	WP2	WP3	WP4	FEM	TIB
MJML K-1597	Rhamphorhynchus	etchesi						60	97	33	171	175	163	153
Mean ratio WP2 over HUM	2.44371
R. etchesi ratio WP2 over HUM	2.91667
Mean Brachial Index	1.63895
R. etchesi Brachial Index	1.61667

## Sheet: Table 1
Table 1
X Var	Y Var	Avg Std Res	Res Compar (p)
MC IV	Tail	0.72	0.002	***
MC IV	WP1	0.57	0.05
MC IV	PCRW	0.84	0.002	***
MC IV	Femur	0.77	0.061
MC IV	Skull	0.74	0.128
MC IV	WP2	0.67	0.005	***
MC IV	Humerus	0.28	0.051
Skull	Tail	0.64	0.035	***
Skull	Humerus	0.69	0.016	***

## Sheet: Regression Tail on MCIV
SUMMARY OUTPUT
Regression Statistics
Multiple R	0.933629
R Square	0.871663
Adjusted R Square	0.869195
Standard Error	34.2506
Observations	54
ANOVA
	df	SS	MS	F	Significance F
Regression	1	414320	414320	353.183	7.72081e-25
Residual	52	61001.4	1173.1
Total	53	475321
	Coefficients	Standard Error	t Stat	P-value	Lower 95%	Upper 95%	Lower 95.0%	Upper 95.0%
Intercept	-60.2009	14.962	-4.0236	0.000186491	-90.2243	-30.1776	-90.2243	-30.1776
X Variable 1	16.481	0.876969	18.7932	7.72081e-25	14.7212	18.2408	14.7212	18.2408
RESIDUAL OUTPUT					PROBABILITY OUTPUT
Observation	Predicted Y	Residuals	Standard Residuals		Percentile	Y
1	351.824	-39.8243	-1.17386	1.17386	0.925926	73
2	351.824	-64.8243	-1.91076	1.91076	2.77778	77
3	335.343	26.6567	0.785732	0.785732	4.62963	80
4	335.343	-44.3433	-1.30706	1.30706	6.48148	82
5	318.862	31.1377	0.917814	0.917814	8.33333	82
6	318.862	1.13771	0.033535	0.033535	10.1852	92
7	310.622	69.3782	2.04499	2.04499	12.037	96
8	302.381	40.6187	1.19728	1.19728	13.8889	100
9	294.141	5.85922	0.172706	0.172706	15.7407	100
10	285.9	39.0997	1.1525	1.1525	17.5926	101
11	285.9	34.0997	1.00512	1.00512	19.4444	106
12	285.9	21.0997	0.621935	0.621935	21.2963	106.5
13	285.9	-31.9003	-0.940292	0.940292	23.1481	110
14	314.742	10.008	0.294994	0.294994	25	112
15	269.419	70.5807	2.08044	2.08044	26.8519	115
16	269.419	-9.41927	-0.277642	0.277642	28.7037	119
17	269.419	-34.4193	-1.01454	1.01454	30.5556	122
18	269.419	-77.4193	-2.28201	2.28201	32.4074	123.5
19	264.475	-10.475	-0.30876	0.30876	34.2593	125
20	264.475	-76.775	-2.26302	2.26302	36.1111	134
21	259.531	-6.53066	-0.192498	0.192498	37.963	140
22	252.938	24.0617	0.709243	0.709243	39.8148	148
23	252.938	12.0617	0.355532	0.355532	41.6667	163
24	252.938	7.06174	0.208152	0.208152	43.5185	171
25	252.938	6.06174	0.178676	0.178676	45.3704	187.7
26	236.457	27.5428	0.811849	0.811849	47.2222	192
27	236.457	0.542752	0.0159981	0.0159981	49.0741	228
28	219.976	30.0238	0.88498	0.88498	50.9259	235
29	215.032	46.9681	1.38443	1.38443	52.7778	237
30	211.736	16.2643	0.479405	0.479405	54.6296	250
31	187.014	-95.0142	-2.80064	2.80064	56.4815	253
32	170.533	0.466787	0.013759	0.013759	58.3333	254
33	165.589	-2.58891	-0.0763107	0.0763107	60.1852	254
34	137.571	-12.5712	-0.370548	0.370548	62.037	259
35	137.571	-18.5712	-0.547404	0.547404	63.8889	260
36	137.571	-36.5712	-1.07797	1.07797	65.7407	260
37	134.275	5.72501	0.16875	0.16875	67.5926	262
38	130.979	3.02121	0.0890531	0.0890531	69.4444	264
39	124.386	-2.38639	-0.0703411	0.0703411	71.2963	265
40	121.09	-39.0902	-1.15222	1.15222	73.1481	277
41	121.09	-44.0902	-1.2996	1.2996	75	287
42	104.609	43.3908	1.27899	1.27899	76.8519	291
43	104.609	18.8908	0.556825	0.556825	78.7037	300
44	104.609	10.3908	0.30628	0.30628	80.5556	307
45	104.609	7.39082	0.217852	0.217852	82.4074	312
46	104.609	1.89082	0.0557338	0.0557338	84.2593	320
47	98.0168	1.98323	0.0584575	0.0584575	86.1111	320
48	96.3687	9.63133	0.283893	0.283893	87.963	324.75
49	96.3687	3.63133	0.107037	0.107037	89.8148	325
50	88.1282	21.8718	0.644694	0.644694	91.6667	340
51	88.1282	7.87183	0.23203	0.23203	93.5185	343
52	88.1282	-6.12817	-0.180634	0.180634	95.3704	350
53	88.1282	-8.12817	-0.239586	0.239586	97.2222	362
54	68.351	4.64904	0.137035	0.137035	99.0741	380
MEAN	206.99	0	0
STDEV	88.42	33.93	1
			AVG ABS RS	0.721692
			SM VS LG	0.0020659

## Sheet: Regression WP1 on MCIV
SUMMARY OUTPUT
Regression Statistics
Multiple R	0.944747
R Square	0.892547
Adjusted R Square	0.890354
Standard Error	11.0359
Observations	51
ANOVA
	df	SS	MS	F	Significance F
Regression	1	49570.3	49570.3	407.013	2.20369e-25
Residual	49	5967.73	121.79
Total	50	55538
	Coefficients	Standard Error	t Stat	P-value	Lower 95%	Upper 95%	Lower 95.0%	Upper 95.0%
Intercept	-23.2255	4.94758	-4.69431	2.18784e-05	-33.168	-13.283	-33.168	-13.283
MC4	5.95041	0.294946	20.1746	2.20369e-25	5.3577	6.54313	5.3577	6.54313
RESIDUAL OUTPUT
Observation	Predicted WP1	Residuals	Standard Residuals
1	23.1877	6.11228	0.559479	0.559479
2	42.229	-11.229	-1.02783	1.02783
3	30.3282	0.671785	0.0614909	0.0614909
4	42.229	-13.229	-1.2109	1.2109
5	30.3282	-1.32821	-0.121576	0.121576
6	30.3282	5.17179	0.473392	0.473392
7	33.8985	-2.79846	-0.256153	0.256153
8	33.3034	2.69658	0.246828	0.246828
9	48.1795	-14.1795	-1.2979	1.2979
10	33.3034	-1.00342	-0.0918468	0.0918468
11	36.2786	0.721372	0.0660298	0.0660298
12	30.3282	2.17179	0.198791	0.198791
13	36.2786	-3.27863	-0.300105	0.300105
14	36.2786	1.22137	0.111797	0.111797
15	48.1795	-13.1795	-1.20636	1.20636
16	43.4191	-3.91912	-0.358732	0.358732
17	36.2786	1.02137	0.0934899	0.0934899
18	48.1795	-4.17945	-0.38256	0.38256
19	45.7993	-5.29929	-0.485063	0.485063
20	46.9894	3.01063	0.275574	0.275574
21	36.2786	13.2214	1.2102	1.2102
22	58.2952	-4.49516	-0.411458	0.411458
23	60.0803	-9.58028	-0.876918	0.876918
24	93.9976	-2.19763	-0.201157	0.201157
26	74.9563	8.04369	0.736268	0.736268
27	95.7828	-7.28276	-0.666617	0.666617
28	83.8819	5.61807	0.514242	0.514242
29	77.9315	17.0685	1.56234	1.56234
30	92.2125	6.58749	0.602977	0.602977
31	93.9976	2.00237	0.183284	0.183284
32	101.733	-2.23317	-0.20441	0.20441
33	89.8323	6.16766	0.564548	0.564548
34	89.8323	1.16766	0.10688	0.10688
35	95.7828	4.21724	0.38602	0.38602
36	76.1464	16.8536	1.54267	1.54267
37	83.8819	17.1181	1.56688	1.56688
38	89.8323	-1.83234	-0.167721	0.167721
39	89.8323	2.66766	0.24418	0.24418
42	104.708	-3.70838	-0.339441	0.339441
43	101.733	9.26683	0.848226	0.848226
44	101.733	12.7668	1.16859	1.16859
45	113.634	-0.633995	-0.0580319	0.0580319
46	101.733	18.2668	1.67203	1.67203
47	95.7828	17.2172	1.57596	1.57596
48	107.684	4.31642	0.395097	0.395097
49	113.634	5.366	0.49117	0.49117
50	119.584	3.91559	0.358408	0.358408
51	110.659	-0.658789	-0.0603013	0.0603013
MEAN	68.9687	1.84171	0.168578
STDEV	30.4021	8.0816	0.739738
			AVG ABS RS	0.57379
			SM VS LG	0.201486
25	95.7828	-38.7828	-3.54993	3.54993
40	125.535	-25.0348	-2.29153	2.29153
41	119.584	-24.5844	-2.2503	2.2503

## Sheet: Regression WP1 on MCIV all
SUMMARY OUTPUT
Regression Statistics
Multiple R	0.940412
R Square	0.884374
Adjusted R Square	0.88306
Standard Error	11.507
Observations	90
ANOVA
	df	SS	MS	F	Significance F
Regression	1	89121.7	89121.7	673.073	5.35787e-43
Residual	88	11652.1	132.41
Total	89	100774
	Coefficients	Standard Error	t Stat	P-value	Lower 95%	Upper 95%	Lower 95.0%	Upper 95.0%
Intercept	-15.4122	3.92793	-3.92375	0.000172539	-23.2181	-7.60629	-23.2181	-7.60629
X Variable 1	5.46395	0.210608	25.9437	5.35787e-43	5.04541	5.88249	5.04541	5.88249
RESIDUAL OUTPUT
Observation	Predicted Y	Residuals	Standard Residuals
2	170.362	7.63785	0.66752	0.66752
4	121.187	-1.18659	-0.103703	0.103703
5	121.187	-20.6866	-1.80793	1.80793
6	121.187	-21.1866	-1.85163	1.85163
7	118.455	0.14539	0.0127066	0.0127066
8	116.269	-16.869	-1.47429	1.47429
9	115.723	7.77737	0.679713	0.679713
10	115.723	-20.7226	-1.81108	1.81108
11	110.259	8.74132	0.763959	0.763959
12	110.259	2.74132	0.239581	0.239581
13	110.259	-8.25868	-0.721778	0.721778
14	107.527	2.47329	0.216157	0.216157
15	106.434	-6.43391	-0.5623	0.5623
16	104.795	7.20527	0.629714	0.629714
17	104.795	-5.79473	-0.506438	0.506438
18	103.702	-11.4019	-0.996487	0.996487
19	103.156	5.84446	0.510784	0.510784
20	102.063	-1.06275	-0.0928807	0.0928807
21	102.063	-7.06275	-0.617259	0.617259
22	99.3308	20.6692	1.80641	1.80641
23	99.3308	18.1692	1.58792	1.58792
24	99.3308	15.1692	1.32573	1.32573
25	99.3308	14.7692	1.29078	1.29078
26	99.3308	11.6692	1.01985	1.01985
27	99.3308	6.06922	0.530428	0.530428
28	99.3308	3.16922	0.276978	0.276978
29	99.3308	0.169223	0.0147894	0.0147894
30	93.8668	19.1332	1.67217	1.67217
31	93.8668	9.13317	0.798206	0.798206
32	93.8668	8.13317	0.71081	0.71081
33	93.8668	7.63317	0.667111	0.667111
34	93.8668	6.13317	0.536017	0.536017
35	93.8668	5.13317	0.448621	0.448621
36	93.8668	2.63317	0.23013	0.23013
37	93.8668	-5.36683	-0.469041	0.469041
39	92.2276	3.77236	0.32969	0.32969
40	92.2276	-0.427639	-0.0373741	0.0373741
41	91.1348	4.86515	0.425196	0.425196
42	91.1348	0.865151	0.075611	0.075611
43	90.5885	8.21155	0.717659	0.717659
44	88.4029	16.5971	1.45053	1.45053
45	88.4029	13.5971	1.18834	1.18834
46	88.4029	11.5971	1.01355	1.01355
47	88.4029	10.5971	0.92615	0.92615
48	88.4029	7.59713	0.663961	0.663961
49	88.4029	4.09713	0.358074	0.358074
50	88.4029	2.59713	0.226979	0.226979
51	88.4029	-0.402873	-0.0352096	0.0352096
52	82.9389	19.5611	1.70957	1.70957
53	82.9389	18.0611	1.57847	1.57847
54	82.9389	12.0611	1.05409	1.05409
55	82.9389	6.56108	0.573414	0.573414
56	79.1142	3.88585	0.339609	0.339609
57	79.1142	1.38585	0.121118	0.121118
58	77.475	17.525	1.53162	1.53162
59	75.8358	17.1642	1.50009	1.50009
60	74.743	8.25701	0.721632	0.721632
61	66.5471	-6.54706	-0.572189	0.572189
62	61.0831	-10.5831	-0.924925	0.924925
63	61.0831	-13.0831	-1.14342	1.14342
64	59.4439	-5.64393	-0.493258	0.493258
65	57.2583	-9.45835	-0.826625	0.826625
66	52.8872	-7.18718	-0.628133	0.628133
67	50.1552	-6.15521	-0.537943	0.537943
68	50.1552	-15.1552	-1.32451	1.32451
69	50.1552	-16.1552	-1.41191	1.41191
70	49.0624	0.937582	0.0819412	0.0819412
71	47.9696	-7.46963	-0.652818	0.652818
72	45.784	-6.28405	-0.549202	0.549202
73	44.6913	-13.6913	-1.19657	1.19657
74	44.6913	-15.6913	-1.37136	1.37136
75	39.2273	10.2727	0.897796	0.897796
76	39.2273	-1.7273	-0.15096	0.15096
77	39.2273	-1.9273	-0.168439	0.168439
78	39.2273	-2.2273	-0.194658	0.194658
79	39.2273	-3.2273	-0.282054	0.282054
80	39.2273	-6.2273	-0.544243	0.544243
81	37.0417	-5.94172	-0.519285	0.519285
82	36.4953	-0.495328	-0.0432898	0.0432898
83	36.4953	-3.29533	-0.288	0.288
84	36.4953	-4.19533	-0.366656	0.366656
85	33.7634	1.73665	0.151777	0.151777
86	33.7634	-1.26335	-0.110412	0.110412
87	33.7634	-2.76335	-0.241507	0.241507
88	33.7634	-4.76335	-0.416299	0.416299
89	31.0314	-1.03138	-0.0901384	0.0901384
90	27.2066	2.09339	0.182955	0.182955
			AVG ABS RS	0.696461
			SM VS LG	0.0538882
38	93.8668	-36.8668	-3.22202	3.22202
1	175.826	-26.8261	-2.3445	2.3445
3	156.702	-31.5023	-2.75318	2.75318

## Sheet: Regression PCRW on MCIV
SUMMARY OUTPUT
Regression Statistics
Multiple R	0.94904
R Square	0.900678
Adjusted R Square	0.89784
Standard Error	10.3184
Observations	37
ANOVA
	df	SS	MS	F	Significance F
Regression	1	33792	33792	317.388	3.94971e-19
Residual	35	3726.42	106.469
Total	36	37518.4
	Coefficients	Standard Error	t Stat	P-value	Lower 95%	Upper 95%	Lower 95.0%	Upper 95.0%
Intercept	0.834759	4.29591	0.194315	0.847053	-7.8864	9.55592	-7.8864	9.55592
X Variable 1	4.414	0.247764	17.8154	3.94971e-19	3.91102	4.91699	3.91102	4.91699
RESIDUAL OUTPUT
Observation	Predicted Y	Residuals	Standard Residuals
1	27.3188	15.6812	1.54129	1.54129
2	35.264	-4.26399	-0.419104	0.419104
3	40.5608	-2.06079	-0.202554	0.202554
4	40.5608	-4.56079	-0.448276	0.448276
5	40.5608	-8.56079	-0.841432	0.841432
6	42.7678	-1.7678	-0.173755	0.173755
7	42.7678	-7.7678	-0.763489	0.763489
8	43.2092	-6.7092	-0.659441	0.659441
9	44.9748	10.0252	0.985368	0.985368
10	44.9748	2.5252	0.2482	0.2482
11	44.9748	-5.9748	-0.587257	0.587257
12	44.9748	-9.9748	-0.980414	0.980414
13	50.2716	-7.2716	-0.714719	0.714719
14	52.0372	-6.0372	-0.593391	0.593391
15	52.92	-4.92001	-0.483583	0.483583
16	53.8028	-6.80281	-0.668641	0.668641
17	61.3066	-4.30661	-0.423293	0.423293
18	62.6308	-4.63081	-0.455158	0.455158
19	62.6308	-8.63081	-0.848315	0.848315
20	67.0448	1.95518	0.192173	0.192173
21	74.5486	12.4514	1.22383	1.22383
22	77.197	-5.19703	-0.510811	0.510811
23	80.2868	20.7132	2.03588	2.03588
24	84.7008	-3.20083	-0.314607	0.314607
25	86.9078	8.09216	0.795371	0.795371
26	87.7906	-6.79064	-0.667445	0.667445
27	89.1148	24.8852	2.44594	2.44594
28	93.5288	13.4712	1.32407	1.32407
29	93.5288	8.47116	0.832622	0.832622
30	95.7358	9.26416	0.910565	0.910565
31	96.6186	15.8814	1.56096	1.56096
32	97.9428	9.05715	0.890219	0.890219
33	99.267	5.73295	0.563487	0.563487
34	102.357	-8.35685	-0.821387	0.821387
35	111.185	-8.18486	-0.804482	0.804482
36	150.911	-12.9109	-1.269	1.269
37	155.325	-19.3249	-1.89943	1.89943
			AVG ABS RS	0.840539
			SM VS LG	0.00256472

## Sheet: Regression PCRW on MCIV no outl
SUMMARY OUTPUT
Regression Statistics
Multiple R	0.950185
R Square	0.902852
Adjusted R Square	0.899908
Standard Error	9.13529
Observations	35
ANOVA
	df	SS	MS	F	Significance F
Regression	1	25594.1	25594.1	306.687	2.83753e-18
Residual	33	2753.96	83.4535
Total	34	28348
	Coefficients	Standard Error	t Stat	P-value	Lower 95%	Upper 95%	Lower 95.0%	Upper 95.0%
Intercept	-7.6563	4.55479	-1.68093	0.102219	-16.9231	1.61049	-16.9231	1.61049
X Variable 1	5.04702	0.288196	17.5125	2.83753e-18	4.46068	5.63336	4.46068	5.63336
RESIDUAL OUTPUT
Observation	Predicted Y	Residuals	Standard Residuals
1	22.6258	20.3742	2.26381	2.26381
2	31.7105	-0.710475	-0.0789421	0.0789421
3	37.7669	0.733098	0.0814559	0.0814559
4	37.7669	-1.7669	-0.196324	0.196324
5	37.7669	-5.7669	-0.640771	0.640771
6	40.2904	0.709587	0.0788435	0.0788435
7	40.2904	-5.29041	-0.587828	0.587828
8	40.7951	-4.29512	-0.477238	0.477238
9	42.8139	12.1861	1.35402	1.35402
10	42.8139	4.68608	0.520678	0.520678
11	42.8139	-3.81392	-0.423772	0.423772
12	42.8139	-7.81392	-0.868219	0.868219
13	48.8704	-5.87035	-0.652266	0.652266
14	50.8892	-4.88916	-0.543244	0.543244
15	51.8986	-3.89856	-0.433177	0.433177
16	52.908	-5.90797	-0.656445	0.656445
17	61.4879	-4.48791	-0.49866	0.49866
18	63.002	-5.00201	-0.555783	0.555783
19	63.002	-9.00201	-1.00023	1.00023
20	68.049	0.950963	0.105663	0.105663
21	76.629	10.371	1.15234	1.15234
22	79.6572	-7.65719	-0.850804	0.850804
23	83.1901	17.8099	1.97889	1.97889
24	88.2371	-6.73713	-0.748575	0.748575
25	90.7606	4.23936	0.471043	0.471043
26	91.77	-10.77	-1.19668	1.19668
27	93.2842	20.7158	2.30178	2.30178
28	98.3312	8.66883	0.963209	0.963209
29	98.3312	3.66883	0.40765	0.40765
30	100.855	4.14532	0.460594	0.460594
31	101.864	10.6359	1.18178	1.18178
32	103.378	3.6218	0.402425	0.402425
33	104.892	0.107698	0.0119665	0.0119665
34	108.425	-14.4252	-1.60281	1.60281
35	118.519	-15.5193	-1.72437	1.72437
			AVG ABS RS	0.784922
			SM VS LG	0.0713462

## Sheet: Regression Femur on MCIV
SUMMARY OUTPUT
Regression Statistics
Multiple R	0.937506
R Square	0.878918
Adjusted R Square	0.877026
Standard Error	3.33524
Observations	66
ANOVA
	df	SS	MS	F	Significance F
Regression	1	5167.75	5167.75	464.566	4.818e-31
Residual	64	711.925	11.1238
Total	65	5879.68
	Coefficients	Standard Error	t Stat	P-value	Lower 95%	Upper 95%	Lower 95.0%	Upper 95.0%
Intercept	-1.16104	1.29323	-0.897784	0.372666	-3.74457	1.42249	-3.74457	1.42249
X Variable 1	1.46611	0.0680212	21.5538	4.818e-31	1.33023	1.602	1.33023	1.602
RESIDUAL OUTPUT
Observation	Predicted Y	Residuals	Standard Residuals
1	48.6868	3.31317	1.00111	1.00111
2	50.1529	-4.65294	-1.40594	1.40594
3	45.0215	-5.42154	-1.63818	1.63818
4	35.4918	1.5082	0.45572	0.45572
5	30.6536	5.34637	1.61547	1.61547
6	29.6273	6.37265	1.92557	1.92557
7	31.8265	3.87348	1.17042	1.17042
8	35.4918	0.00819727	0.0024769	0.0024769
9	29.6273	5.37265	1.62341	1.62341
10	30.3604	4.6396	1.40191	1.40191
11	29.6273	3.37265	1.01909	1.01909
12	32.5596	-0.559575	-0.169082	0.169082
13	31.3867	0.313316	0.0946721	0.0946721
14	35.4918	-3.9918	-1.20617	1.20617
15	26.6951	4.30488	1.30077	1.30077
16	25.229	5.77099	1.74377	1.74377
17	26.6951	4.30488	1.30077	1.30077
18	26.6951	4.30488	1.30077	1.30077
19	35.4918	-4.4918	-1.35725	1.35725
20	31.5333	-0.733295	-0.221574	0.221574
21	28.1612	2.33877	0.706686	0.706686
22	31.0935	-1.09346	-0.330402	0.330402
23	29.6273	0.372653	0.112601	0.112601
24	26.6951	3.30488	0.998609	0.998609
25	31.0935	-1.09346	-0.330402	0.330402
26	28.1612	1.83877	0.555605	0.555605
27	28.1612	1.83877	0.555605	0.555605
28	27.2816	2.71843	0.821407	0.821407
29	27.7214	0.978601	0.295696	0.295696
30	27.4282	1.07182	0.323864	0.323864
31	27.7214	0.778601	0.235263	0.235263
32	30.8002	-2.70024	-0.815909	0.815909
33	26.6951	1.30488	0.394285	0.394285
34	25.229	2.77099	0.837289	0.837289
35	25.229	2.27099	0.686208	0.686208
36	28.1612	-0.861234	-0.260232	0.260232
37	34.1723	-7.0723	-2.13698	2.13698
38	29.6273	-2.62735	-0.793884	0.793884
39	24.2027	2.49727	0.754581	0.754581
40	29.6273	-3.62735	-1.09605	1.09605
41	26.6951	-0.69512	-0.210039	0.210039
42	26.6951	-1.19512	-0.36112	0.36112
43	24.2027	1.09727	0.331554	0.331554
44	19.3646	-1.36455	-0.412315	0.412315
45	28.1612	-10.1612	-3.07034	3.07034
46	18.9247	-1.92472	-0.581576	0.581576
47	19.3646	-2.36455	-0.714477	0.714477
48	20.8307	-4.33066	-1.30856	1.30856
49	13.5001	2.4999	0.755376	0.755376
50	14.9662	1.03379	0.312372	0.312372
51	16.4323	-0.732323	-0.22128	0.22128
52	12.034	1.96602	0.594056	0.594056
53	13.5001	0.299905	0.0906198	0.0906198
54	15.2594	-1.75943	-0.531633	0.531633
55	20.8307	-7.83066	-2.36613	2.36613
56	13.5001	-1.0001	-0.302191	0.302191
57	15.8459	-3.34588	-1.011	1.011
58	13.5001	-1.1001	-0.332407	0.332407
59	12.767	-0.467038	-0.141121	0.141121
60	14.9662	-2.96621	-0.896275	0.896275
61	12.034	-0.0339812	-0.0102678	0.0102678
62	12.767	-1.06704	-0.322418	0.322418
63	12.9136	-1.41365	-0.427151	0.427151
64	10.2746	0.725355	0.219175	0.219175
65	11.3009	-0.300924	-0.0909278	0.0909278
66	12.034	-1.53398	-0.463511	0.463511
			AVG ABS RS	0.773842
			SM VS LG	0.0612459

## Sheet: Regression of Skull on MCIV
SUMMARY OUTPUT
Regression Statistics
Multiple R	0.903196
R Square	0.815762
Adjusted R Square	0.813092
Standard Error	13.7541
Observations	71
ANOVA
	df	SS	MS	F	Significance F
Regression	1	57795.8	57795.8	305.516	4.779e-27
Residual	69	13053	189.174
Total	70	70848.8
	Coefficients	Standard Error	t Stat	P-value	Lower 95%	Upper 95%	Lower 95.0%	Upper 95.0%
Intercept	-8.35928	5.29162	-1.57972	0.118744	-18.9158	2.1972	-18.9158	2.1972
X Variable 1	4.94202	0.28274	17.479	4.779e-27	4.37797	5.50607	4.37797	5.50607
RESIDUAL OUTPUT
Observation	Predicted Y	Residuals	Standard Residuals
1	164.611	-14.6113	-1.07	1.07
2	159.669	0.330716	0.0242186	0.0242186
3	115.191	-5.19113	-0.380151	0.380151
4	115.191	-13.1911	-0.965997	0.965997
5	115.191	-13.6911	-1.00261	1.00261
6	112.72	-26.8201	-1.96406	1.96406
7	110.743	-16.0433	-1.17486	1.17486
8	110.249	-15.2491	-1.1167	1.1167
9	105.307	14.6929	1.07597	1.07597
10	102.836	0.663908	0.0486185	0.0486185
11	101.848	-3.34769	-0.245154	0.245154
12	101.353	0.246513	0.0180523	0.0180523
13	100.365	15.6349	1.14496	1.14496
14	100.365	-0.365084	-0.0267354	0.0267354
15	99.3767	-36.0767	-2.64192	2.64192
16	98.8825	13.1175	0.960606	0.960606
17	97.8941	7.10592	0.520372	0.520372
18	95.4231	17.0769	1.25056	1.25056
19	95.4231	10.5769	0.774557	0.774557
20	95.4231	9.07693	0.664711	0.664711
21	95.4231	8.57693	0.628095	0.628095
22	95.4231	7.57693	0.554865	0.554865
23	95.4231	6.57693	0.481634	0.481634
24	95.4231	4.57693	0.335172	0.335172
25	90.4811	34.5189	2.52785	2.52785
26	90.4811	4.51895	0.330926	0.330926
27	90.4811	4.51895	0.330926	0.330926
28	90.4811	3.51895	0.257695	0.257695
29	90.4811	-0.481051	-0.0352277	0.0352277
30	90.4811	-3.48105	-0.25492	0.25492
31	90.4811	-24.4811	-1.79277	1.79277
32	88.9984	1.00155	0.0733446	0.0733446
33	88.9984	-20.0984	-1.47182	1.47182
34	88.01	3.98996	0.292188	0.292188
35	88.01	3.98996	0.292188	0.292188
36	87.5158	13.4842	0.987455	0.987455
37	85.539	15.961	1.16883	1.16883
38	85.539	9.46097	0.692834	0.692834
39	85.539	5.46097	0.399911	0.399911
40	85.539	-5.53903	-0.405628	0.405628
41	85.539	-6.83903	-0.500828	0.500828
42	80.597	42.703	3.12717	3.12717
43	80.597	16.403	1.2012	1.2012
44	80.597	9.40298	0.688588	0.688588
45	75.655	14.845	1.08711	1.08711
46	74.1724	20.8276	1.52522	1.52522
47	73.184	5.31601	0.389295	0.389295
48	65.771	-0.770967	-0.0564585	0.0564585
49	65.771	-25.771	-1.88723	1.88723
50	60.829	-3.82895	-0.280397	0.280397
51	60.829	-5.32895	-0.390243	0.390243
52	59.3463	-5.04635	-0.369548	0.369548
53	57.3695	-7.56954	-0.554323	0.554323
54	50.9449	-9.94492	-0.728274	0.728274
55	50.9449	-15.9449	-1.16766	1.16766
56	49.9565	0.243486	0.0178307	0.0178307
57	48.9681	-7.96811	-0.583511	0.583511
58	46.9913	-7.9913	-0.585209	0.585209
59	46.0029	-25.0029	-1.83098	1.83098
60	41.0609	8.93912	0.654618	0.654618
61	41.0609	0.939116	0.0687722	0.0687722
62	41.0609	-1.06088	-0.0776893	0.0776893
63	41.0609	-5.06088	-0.370612	0.370612
64	41.0609	-6.06088	-0.443843	0.443843
65	41.0609	-10.0609	-0.736766	0.736766
66	38.5899	-3.58988	-0.262889	0.262889
67	38.5899	-4.58988	-0.33612	0.33612
68	36.1189	-3.11887	-0.228397	0.228397
69	31.1769	-0.176851	-0.0129509	0.0129509
70	30.1884	-5.18845	-0.379954	0.379954
71	21.2928	23.7072	1.73609	1.73609
			AVG ABS RS	0.741759
			SM VS LG	0.128073

## Sheet: Regression WP2 on MCIV
SUMMARY OUTPUT
Regression Statistics
Multiple R	0.92304
R Square	0.852002
Adjusted R Square	0.850261
Standard Error	12.0304
Observations	87
ANOVA
	df	SS	MS	F	Significance F
Regression	1	70821.7	70821.7	489.334	5.07798e-37
Residual	85	12302.1	144.731
Total	86	83123.9
	Coefficients	Standard Error	t Stat	P-value	Lower 95%	Upper 95%	Lower 95.0%	Upper 95.0%
Intercept	-18.3912	4.38716	-4.19205	6.74334e-05	-27.114	-9.66835	-27.114	-9.66835
X Variable 1	5.37107	0.242805	22.1209	5.07798e-37	4.88831	5.85383	4.88831	5.85383
RESIDUAL OUTPUT
Observation	Predicted Y	Residuals	Standard Residuals
1	150.798	-48.9975	-4.09669	4.09669
2	115.886	-3.88558	-0.324874	0.324874
3	115.886	-13.4856	-1.12753	1.12753
4	115.886	-18.8856	-1.57903	1.57903
5	113.2	-25.3	-2.11534	2.11534
6	111.052	-19.8516	-1.6598	1.6598
7	110.515	8.48549	0.709474	0.709474
8	110.515	-18.5145	-1.548	1.548
9	105.143	6.85657	0.573279	0.573279
10	105.143	3.85657	0.322448	0.322448
11	105.143	-5.14343	-0.430043	0.430043
12	102.458	6.5421	0.546986	0.546986
13	101.384	-7.38368	-0.617351	0.617351
14	99.7724	10.2276	0.855134	0.855134
15	99.7724	-4.77236	-0.399018	0.399018
16	98.6981	-7.69815	-0.643643	0.643643
17	98.161	9.13896	0.76411	0.76411
18	97.0868	5.91317	0.494401	0.494401
19	97.0868	-4.38683	-0.366783	0.366783
20	94.4013	23.5987	1.97309	1.97309
21	94.4013	19.5987	1.63865	1.63865
22	94.4013	14.1987	1.18716	1.18716
23	94.4013	13.5987	1.13699	1.13699
24	94.4013	5.59871	0.468109	0.468109
25	94.4013	4.59871	0.384499	0.384499
26	94.4013	4.59871	0.384499	0.384499
27	89.0302	19.4698	1.62787	1.62787
28	89.0302	7.96978	0.666354	0.666354
29	89.0302	5.96978	0.499134	0.499134
30	89.0302	5.96978	0.499134	0.499134
31	89.0302	4.96978	0.415524	0.415524
32	89.0302	3.46978	0.290109	0.290109
33	89.0302	3.46978	0.290109	0.290109
34	89.0302	-5.03022	-0.420578	0.420578
35	89.0302	-38.0302	-3.17971	3.17971
36	87.4189	5.9811	0.500081	0.500081
37	87.4189	3.5811	0.299416	0.299416
38	86.3447	5.65531	0.472842	0.472842
39	86.3447	4.65531	0.389231	0.389231
40	85.8076	6.39242	0.534471	0.534471
41	83.6592	21.8408	1.82612	1.82612
42	83.6592	14.3408	1.19904	1.19904
43	83.6592	11.3408	0.94821	0.94821
44	83.6592	10.3408	0.8646	0.8646
45	83.6592	8.34085	0.69738	0.69738
46	83.6592	3.84085	0.321134	0.321134
47	83.6592	2.34085	0.195719	0.195719
48	83.6592	-2.65915	-0.222332	0.222332
49	78.2881	21.7119	1.81534	1.81534
50	78.2881	18.7119	1.56451	1.56451
51	78.2881	8.21192	0.6866	0.6866
52	78.2881	4.01192	0.335437	0.335437
53	74.5283	3.97167	0.332072	0.332072
54	74.5283	-4.02833	-0.336809	0.336809
55	72.917	2.08299	0.174159	0.174159
56	71.3057	16.1943	1.35401	1.35401
57	70.2315	9.26853	0.774943	0.774943
58	62.1749	-7.17487	-0.599892	0.599892
59	56.8038	-14.8038	-1.23775	1.23775
60	56.8038	-15.8038	-1.32136	1.32136
61	55.1925	-5.79248	-0.48431	0.48431
62	53.044	-7.04405	-0.588954	0.588954
63	48.7472	-5.44719	-0.45544	0.45544
64	46.0617	-6.06166	-0.506816	0.506816
65	46.0617	-13.0617	-1.09209	1.09209
66	44.9874	1.01256	0.0846602	0.0846602
67	43.9132	-5.91323	-0.494406	0.494406
68	41.7648	-5.7648	-0.481996	0.481996
69	40.6906	-13.6906	-1.14467	1.14467
70	40.6906	-14.1906	-1.18648	1.18648
71	35.3195	7.18049	0.600362	0.600362
72	35.3195	-0.319514	-0.0267146	0.0267146
73	35.3195	-2.31951	-0.193935	0.193935
74	35.3195	-3.51951	-0.294267	0.294267
75	35.3195	-3.81951	-0.31935	0.31935
76	35.3195	-5.81951	-0.48657	0.48657
77	33.1711	-4.17109	-0.348745	0.348745
78	32.634	-1.83398	-0.153339	0.153339
79	32.634	-3.33398	-0.278754	0.278754
80	32.634	-4.03398	-0.337282	0.337282
81	29.9484	0.0515568	0.00431067	0.00431067
82	29.9484	-1.44844	-0.121105	0.121105
83	29.9484	-3.24844	-0.271603	0.271603
84	29.9484	-3.94844	-0.33013	0.33013
85	27.2629	-1.96291	-0.164119	0.164119
86	24.5774	2.92263	0.244361	0.244361
87	23.5032	0.496842	0.041541	0.041541
			AVG ABS RS	0.735347
			SM VS LG	0.00552767

[truncated: 5 more sheets: Tail on Skull, Hum on Skull, Hum on MCIV, Sheet3, Regression Data]
